# Supplementary material for: In situ NMR and XRD studies of the growth mechanism of SBA-1
Source: Royal Society of Chemistry journal article supplement (doi:10.1039/b419293c), 2005-01-01
Supplement: b419293c.doc [file b419293c.doc]

*In-situ* NMR and XRD studies of the growth mechanism of SBA-1

C.C. Egger§, M.W. Anderson§*, G.J.T. Tiddy‡, J.L. Casci#

##### **Supplementary Information**

##### Derjaguin, Landau Verwey and Overbeek Theory (DLVO) Considerations

Owing to the high salt concentrations in these preparations under acidic conditions it is worth making some initial considerations from DLVO theory. DLVO energy versus distance profiles describing the forces between two similarly charged colloid particles [8, p.238], (micelles for instance) deals with two types of forces, electrostatic repulsion and van der Waals attraction. When the surface potential approaches zero (with increased screening of the double-layer repulsion by increasing the salt concentration), the curve tends to follow the pure van der Waals curve and particles attract. Van der Waals interactions are insensitive to pH or electrolyte variations and decay rapidly (*1/D6*, short-range forces). They are directly correlated to the size of the particles: as an approximation these forces are effective on the scale of the particle size. Taking micelles *ca.* 50 Å large, they can experience substantial van der Waals forces only if they are less than *ca.* 50 Å apart. Regarding the electrostatic interactions, they are strongly dependent on the electrolyte concentration in solution and decay slowly without electrolyte (*1/D*). The length over which Coulombic (electrostatic) interactions are dominant can be calculated for different types of electrolytes [8, p. 238], the so-called Debye length. The Debye length *1/* is proportional to. As the concentration of electrolyte increases, the length of the electrostatic double layer, over which the Coulombic interactions are effective, decreases. For a solution of 1:1 electrolyte (HCl for instance such as in SBA-1 mixture), the equation relating the Debye length to the concentration of electrolyte is as such [8, p238]: . The calculation in the case of SBA-1 made at pH=-0.7, with 4.4M HCl, gives a Debye length of 1.45 Å. Substantial Coulombic interactions are effective only over distances between particles less than 1.45 Å ; smaller than the size of a water molecule (approximately 3 Å); yet, it is extremely likely that a hydration sheath covers the species present in solution since there is so much water in a typical SBA synthesis (H2O:HCl:HTEAB 3500:280:1 for SBA-1). Hence, the way the concept of the electric double layer is applied to explaining mesoporous formation in acidic medium seems questionable (N.B. in the literature it is even thought as a “triple layer” not a double layer [4]). Therefore, forces on the short-range scale (inter-molecular van der Waals, steric, solvation) experienced by ions present in solution govern the overall energetic balance of the system.

Consequently, DVLO theory alone suggests that Coulombic interactions can not satisfactorily account for mesophase precipitation. Nevertheless, there is one strong experimental piece of evidence in favour of a cooperative assembly process that leads to meso-structures. Without the presence of silica, there is not enough surfactant in solution for a mesophase to form [19]. Hence other species present in solution must induce the mesophase precipitation. Our *in-situ* work aims to investigate this process by the use of two different techniques: NMR to access the mobility of species, and energy dispersive X-ray diffraction (EDXRD) to track the appearance of ordering.

**Above : Growth of two diffracted peaks with time for batches D, F, G, H and I at RT and then upon heating to 90C for SBA-1. Inset: final XRD pattern of the resulting powder. Below : Evolution of the d-spacings with time at RT and then at 90C. Heights are compared to the maximum background height around d**
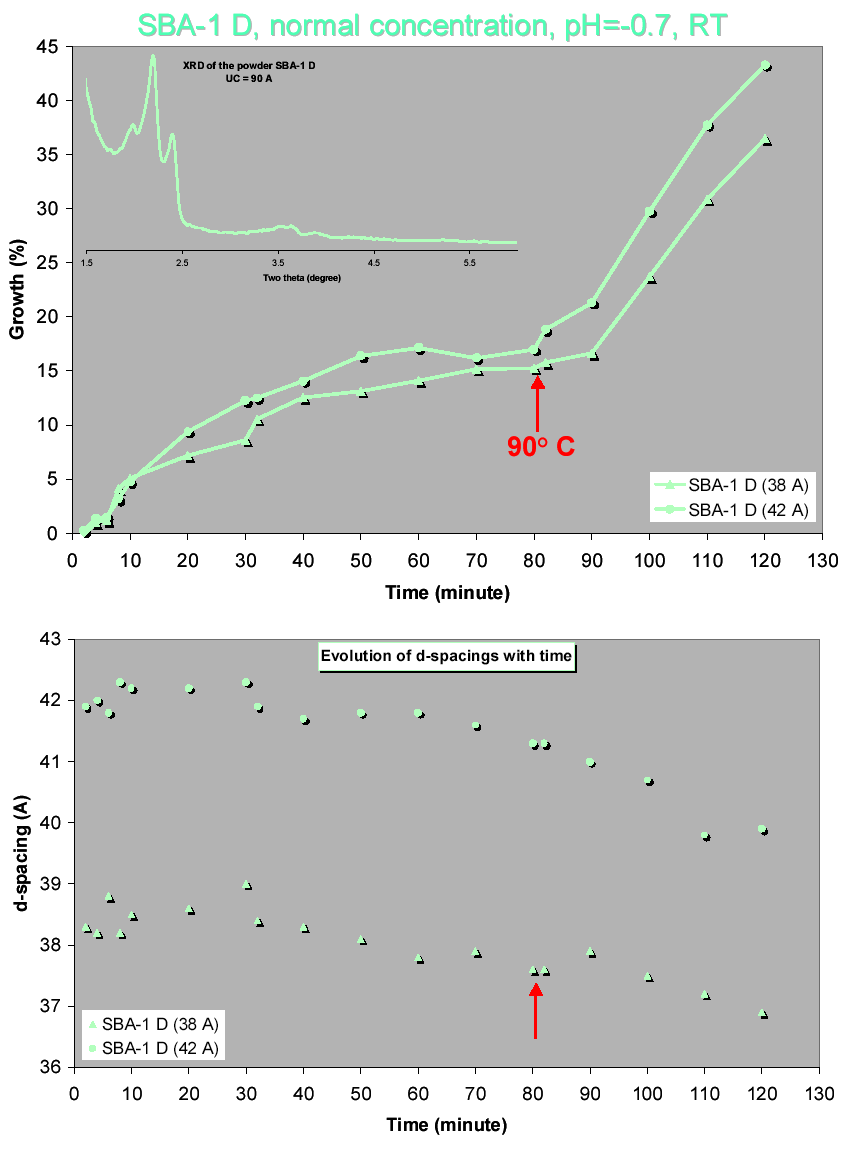
**= 26 Å.**


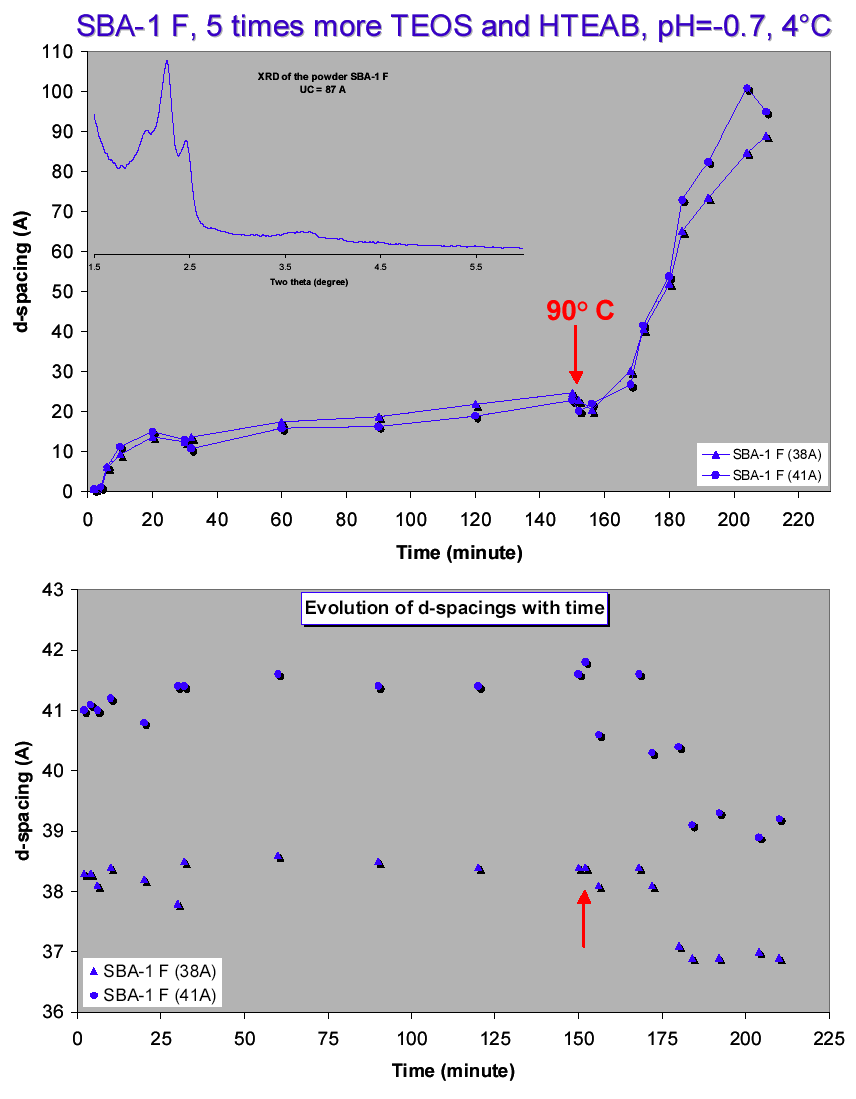

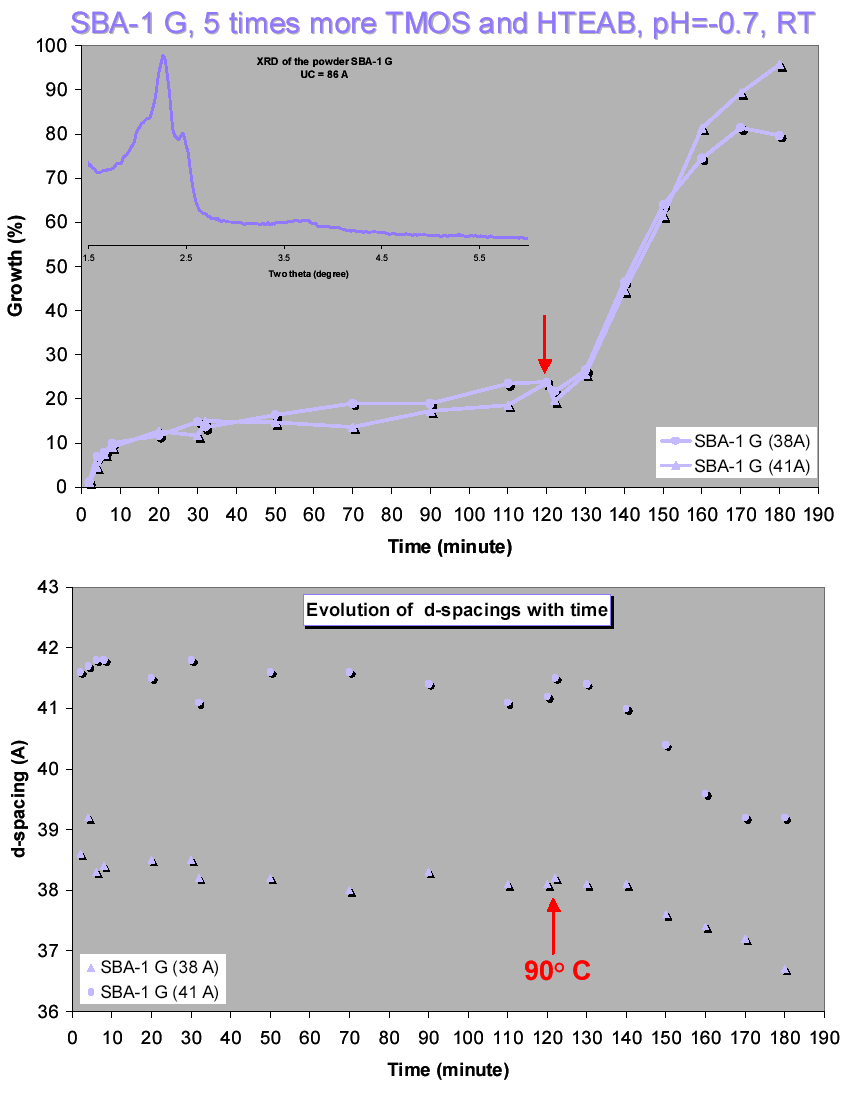

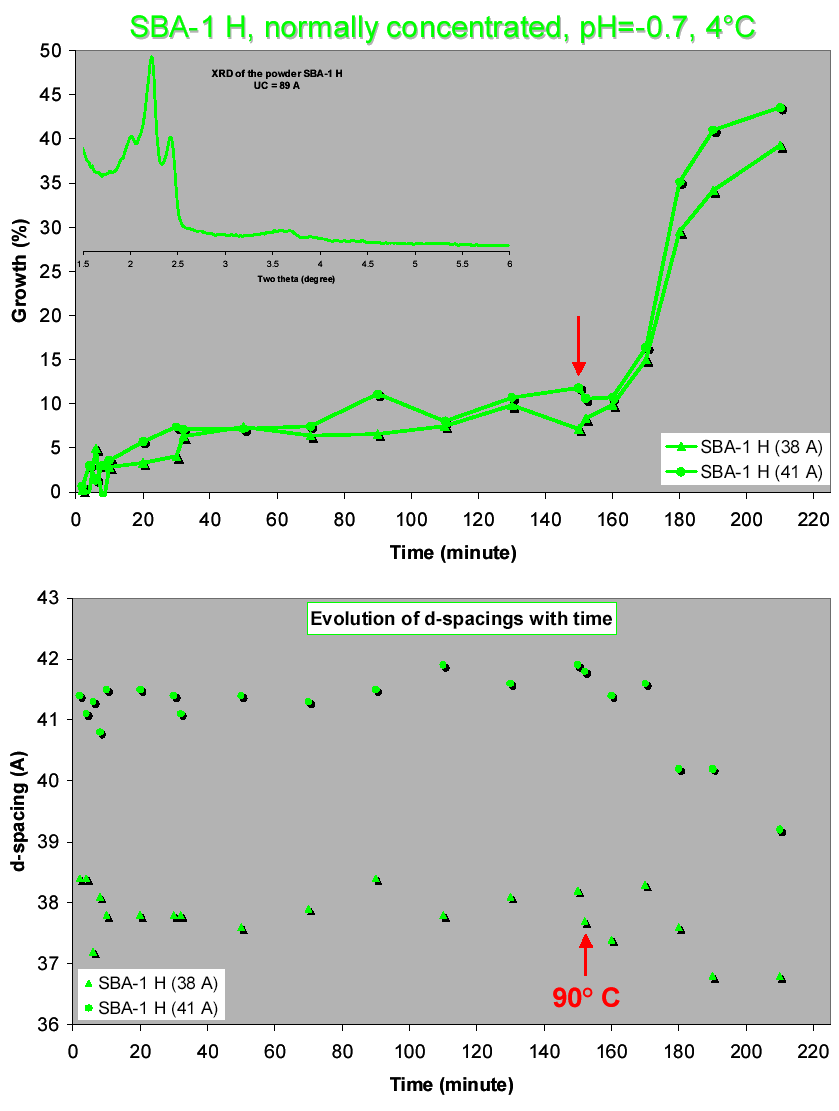

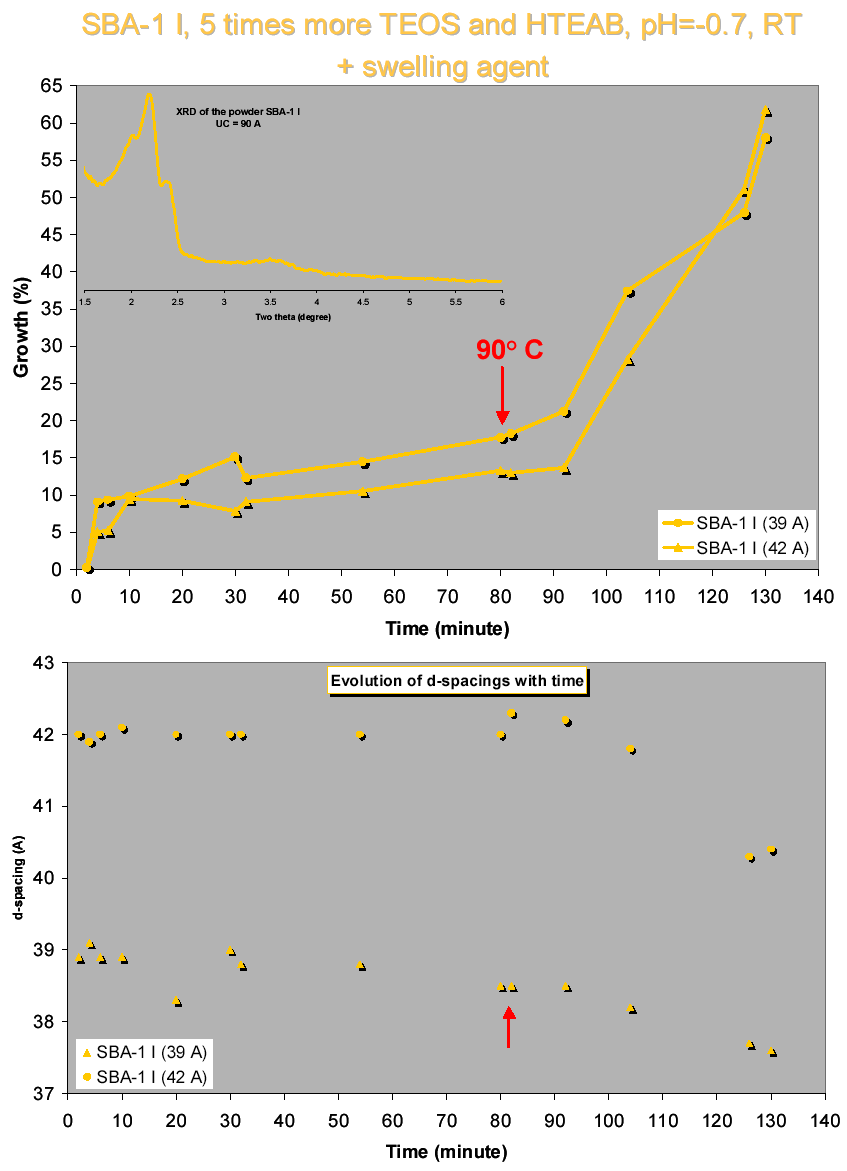


**Time constants of growth extracted from exponential fits of EDXRD patterns before heating, for SBA-1 batches D, F, G, H and I for the two d-spacings 38 and 42 Å.**
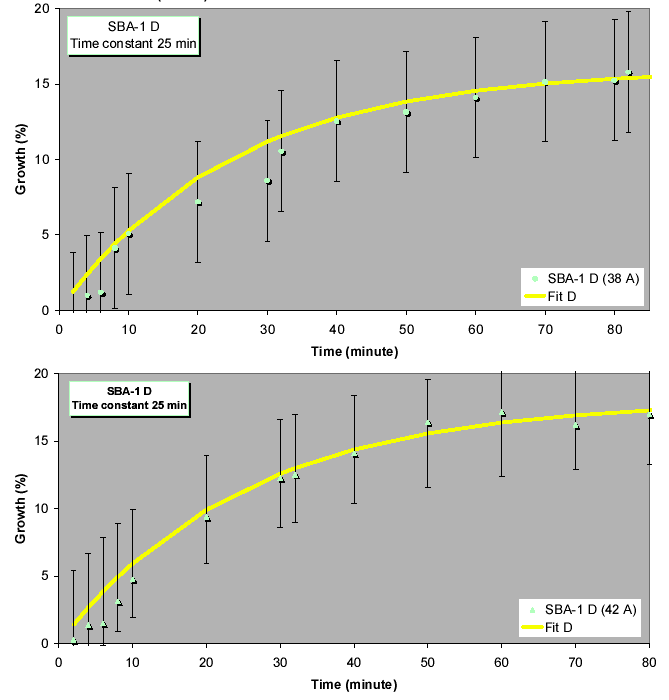

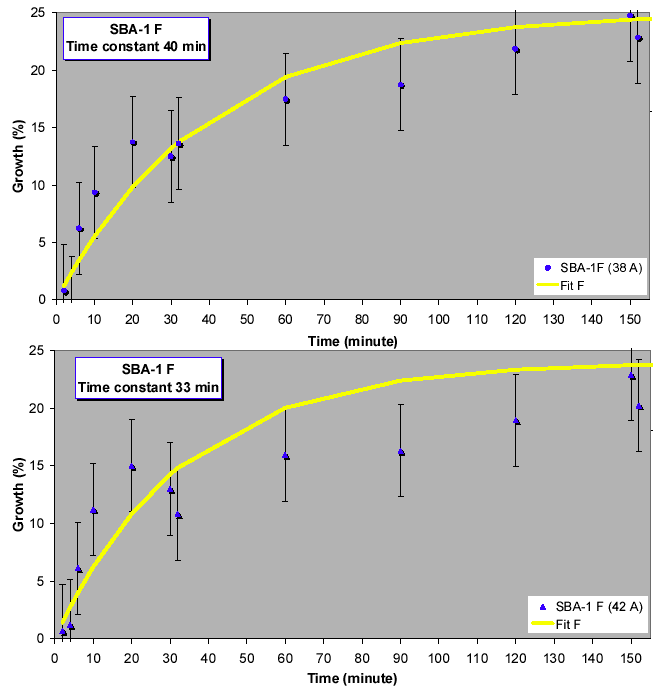

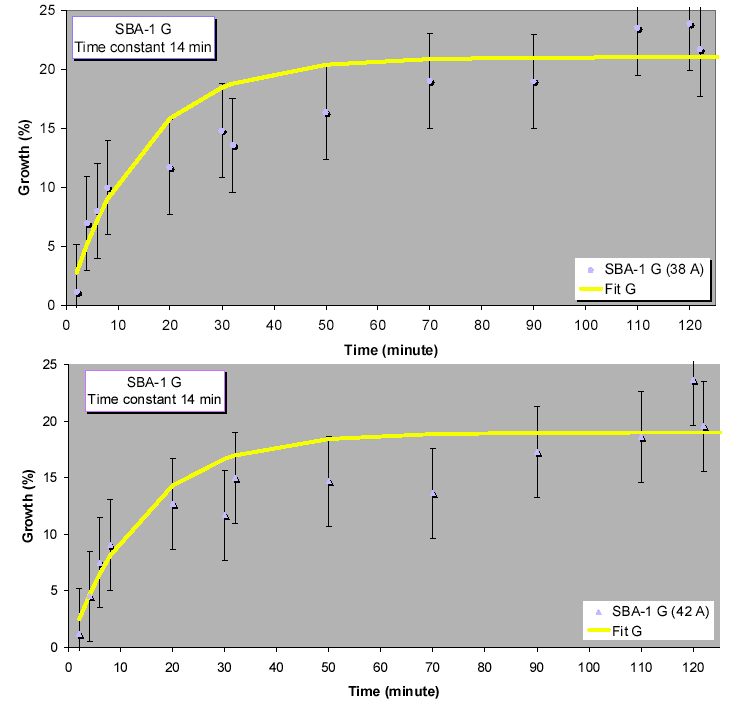

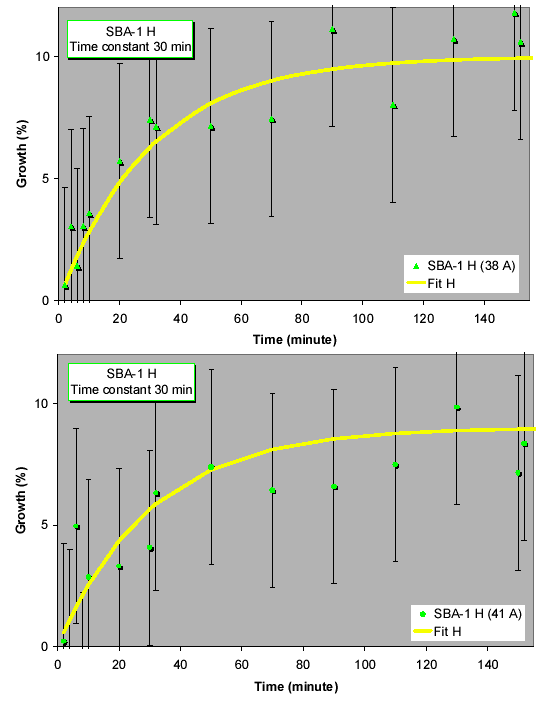

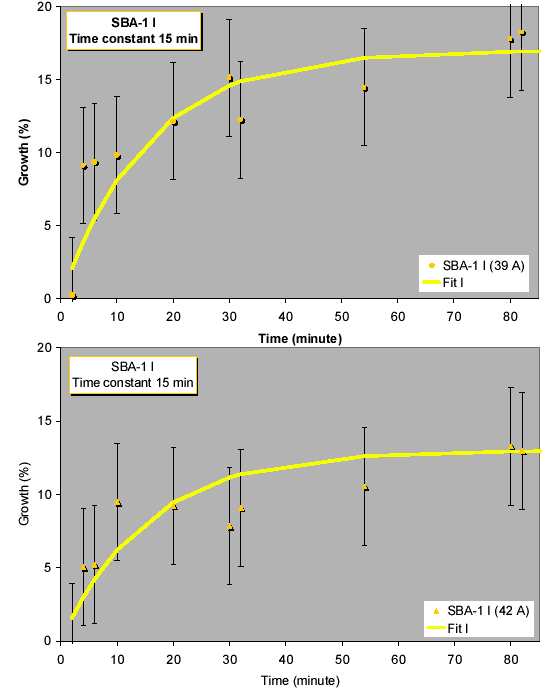


**Decay of 14N NMR signal as a function of time for pH=1. Inset: XRD pattern of the final material.**


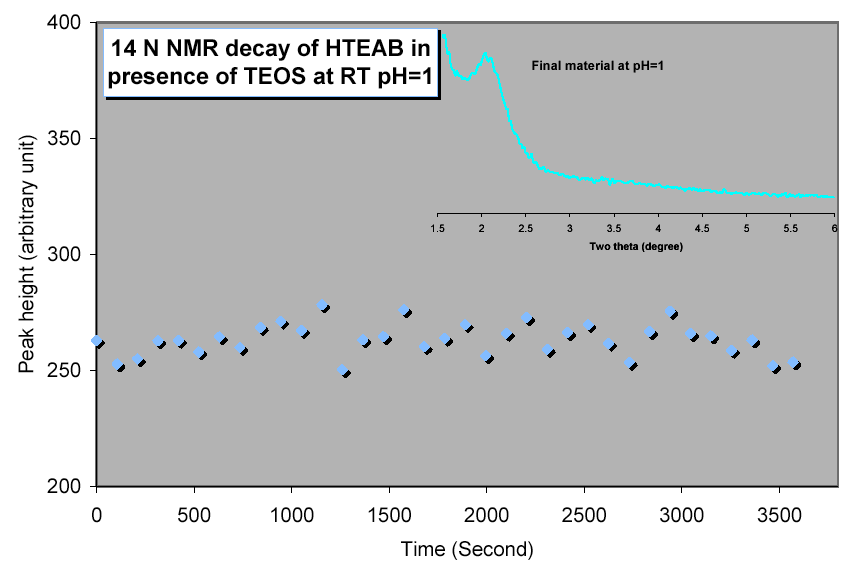


**14N NMR spectra for HTEAB/water mixtures showing spectra for the 5 phases, lamellar,**
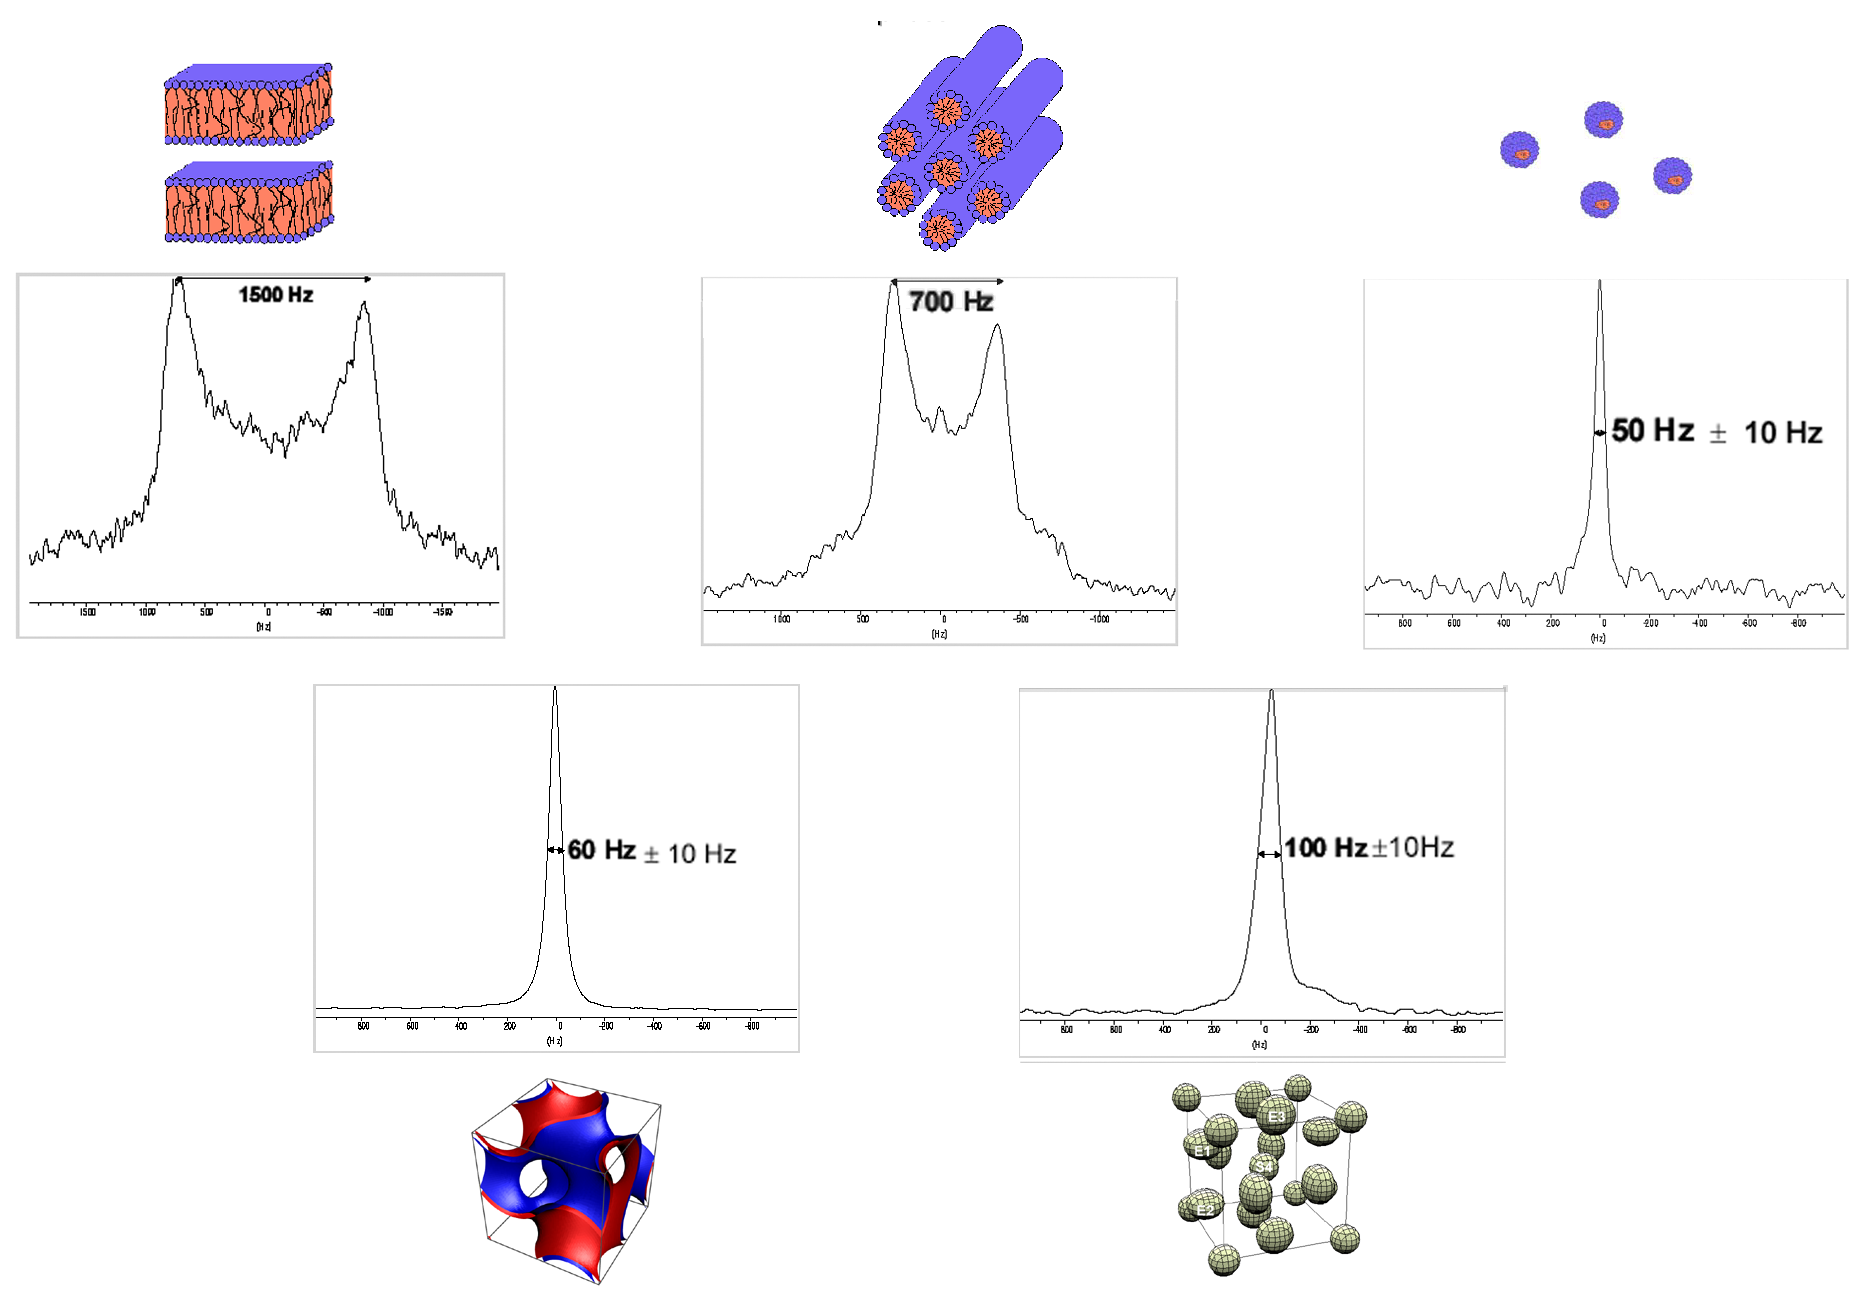
**bicontinuous cubic, hexagonal, and isotropic.**
